# Supplementary material for: Baseline Quality-of-Care Data From a Quality-Improvement Program Implemented by a Network of Diabetes Outpatient Clinics
Source: Oxford University Press journal article supplement (doi:10.2337/dc08-0469), 2008-08-12
Supplement: dc080469-sup-appendix.doc [file dc080469-sup-appendix.doc]

APPENDIX:

Steering Committee: G. Vespasiani – S. Benedetto del Tronto (AP); A. Arcangeli – Prato; D. Cucinotta – Messina; M. Comaschi – Genova; A. Ceriello – Coventry (UK); S. De Cosmo – S. Giovanni Rotondo (FG); C. Giorda – Chieri (TO); A. Nicolucci – S. Maria Imbaro (CH); U. Valentini – Brescia;

Quality Group: G. De Bigontina – Belluno; A. Cimino – Brescia; D. Fava – Roma; I. Meloncelli – S. Benedetto del Tronto (AP); D. Orlandini – Reggio Emilia

Coordinating Center and Statistical Analysis: Memmo R., Otranto I., Pellegrini F., Pomili B. – S. Maria Imbaro (CH)

Data management: Me.Te.Da. srl – S. Benedetto del Tronto (AP)

Participating Centers:G. Reina – Adrano (CT); A. Pipitone, E. Bodner, A. Bonanome – Adria (RO); I. Testa, M. Boemi, R. Giansanti, F. Romagnoli, R. Testa, R. Rabini, G. Brandoni – Ancona; P. Di Berardino, P. Colleluori, V. Montani, V. Trosini – Atri (TE); M. Velussi – Aurisina (TS); V. Paciotti, P. Alfidi – Avezzano (AQ); C. Rinaldi – Benevento; V. Bertone, C. Capellini, D. Camozzi, E. Remondini – Bergamo; G. Laffi, A. Ciavarella – Bologna; U. Valentini, A. Cimino – Brescia; G. De Blasi, M. Bergmann, L. De Moliner – Bressanone (BZ); A. Trinchera – Brindisi; L. Carboni, M.P. Turco, A. Delogu, M. Floris, M.G. Murtas, L. Farris – Cagliari; M. Manai, F. Spanu – Cagliari; M. Songini, G. Piras, R. Seguro, R. Floris, G. Corona, M. Lai, S. Lostia, E. Piras – Cagliari; A. Aiello, M.R. Cristoforo, S. Di Vincenzo, L. Cocco – Campobasso; M. Dolci, M. Mori, F. Baccetti, G. Gregori – Carrara (MS); G. Pozzuoli, M. Laudato – Caserta; J. Grosso, B. Di Nardo, L. Rossi, A. Scialli – Castel di Sangro (AQ); L. Confortin, N. Marin, M. Lamonica – Castel Franco (TV); M. Di Mauro, R. Battiato – Catania; I. Lorenti – Catania; A. Boscolo Bariga, G. Ballarin, A. Nogara, S. De Boni – Chioggia (VE); A. Chiambretti, R. Fornengo, E.M. Mularoni – Chivasso (TO); A. Rocca, P. Rumi, L. Cacopardo, B. Balsarini – Cinisello Balsamo (MI); G. Santantonio, S. Sebastiani, G. Baldi, L. Massa – Civitavecchia (RM); G. Ghilardi, P. Fiorina – Clusone (BG); E.A. Bosi, D. Gaiti, G. Chierici, S. Pilla – Correggio (RE); A. Longobucco – Cosenza; G. Magro – Cuneo; N. Musacchio, A. Giancaterini, A. Lovagnini Scher – Cusano Milanino (MI); G. Marelli – Desio (MI); G. Placentino, S. Pellanda, V. Zizzari – Domodossola (VB); D. Richini, S. Molinari – Esine (BS); L. Cotti, G. Garrapa – Fano (PU); P. Foglini, C. Bedetta, E. Tortato, P. Pantanetti, R. Manicotti – Fermo; A. Leopardi – Fiesole (FI); C. Baggiore, A. Leopardi, T. Pedone, P. De Carlo, C. Crescenti – Firenze; M. Cignarelli, A. Caroleo, O. Lamacchia – Foggia; C. Mastrangelo – Foggia; A. Carducci Artenisio, G. Stabile – Gazzi (ME); C. Taboga, B. Catone – Gemona del Friuli (UD); G. Ghisoni, F. Fabbri, M. Torresan, R. Crovetto – Genova; G. Sanfilippo, A. Rapisarda – Giarre (CT); G. Campobasso – Gioia del Colle (BA); M. Merni, B. Brunato – Gorizia; M. Rossi, G. Sabbatini, F. Quadri, L. Sambuco – Grosseto; E. Bosi – Guastalla (RE); C. Marino, A. Micheletti, M. Agostinelli, A. Petrelli – Gubbio (PG); A. Corda, L. Pisano, G. Guaita – Iglesias (CI); M. Pupillo, A. De Luca – Lanciano (CH); A. Massidda, G. Meloni – Lanusei (NU); R. Meniconi – Lido di Camaiore (LU); F. Giannini, A. di Carlo, I. Casadidio, G. Simonetti, S. Santini, C. Russo, A. Galli, M. Piacentini, E. Del Bianco – Lucca; G. Maolo, B. Polenta, A.M. Tesei, S. Sciamanna, M. Giovannietti, S. Lardelli, M. Santini – Macerata; G. Pozzuoli, M. Laudato – Maddaloni (CE); C. Vincenti – Maglie (LE); L. Sciangula, E. Banfi, A. Ciucci, A. Contartese – Mariano Comense (CO); P. Tatti, D. Bloise, P. Di Mauro, L. Masselli – Marino (RM); M. Dolci, M. Mori, F. Baccetti, G. Gregori – Massa (MS); A. Venezia, R. Morea, G. Lagonigro – Matera; D. Cucinotta, A. Di Benedetto – Messina; G. Saitta – Messina; P. Pata, T. Mancuso – Messina; A. Zocca, B. Aiello – Milano; G. Mariani, P.D. Ragonesi, P. Bollati, P. Colapinto – Milano; G. Testori, P. Rampini, N. Cerutti – Milano; C. Giorda, M. Comoglio, R. Manti, M.D. Zecca – Moncalieri (TO); A.M. Cernigoi, C. Tortul – Monfalcone (GO); G. Panebianco – Monselice (PD); V. Manicardi, M. Michelini, L. Finardi – Montecchio (RE); R. Carleo, A. Gatti, R. Giannettina, M. Gobbo, M. Bonavita, E. Creso – Napoli; S. Turco, A.A. Turco, C. Iovine, C. De Natale – Napoli; L. Zenari – Negrar (VR); A. Gigante, A.M. Cicalò, C. Clausi, R. Cau – Nuoro; A.M. Cicalò – Nuoro; G. Saglietti – Omegna (VB); M. Balsanelli, M. Fetonti, A. Rotolo, P. Sambo – Ostia (RM); M.T. Tenconi, F. Roncarolo, C. Mazzaro – Pavia; E. Picchio, P. Del Sindaco – Perugia; A. Spalluto, L. Maggiulli, L. Ricciardelli – Pesaro (PU); D. Zavaroni, U. De Johannon – Piacenza; G. de Bigontina, A. Silvestri – Pieve di Cadore (BL); R. Gelisio, P. Li Volsi – Portogruaro (RO); O. Vasta – Randazzo (CT); P. Di Bartolo, A. Scaramuzza, P. Melandri – Ravenna; C. Giovannini, P. Romeo – Reggio Calabria; E. Rastelli – Riccione (RN); R. Amoretti, F. Piergiovanni, F. Massimiani, A. Simonetta, D. Fava – Roma; S. Leotta, C. Suraci, N. Visalli, R. Gagliardi – Roma; F. Chiaramonte, R. Giordano, M. Rossini, M.A. Serra – Roma; A. Urbani, D. Cappelloni, A. Gelli, A.M. Cianconi - Roma; G. Testa, S. Colasanti, G.M. Lombardi – Roma; G. Armentano, M.G. Restuccia, B. Russo – Rossano (CS); P. Li Volsi – Sacile (PN); G. Vespasiani, I. Meloncelli, L. Clementi, M. Galetta, M. Santangelo – San Benedetto del Tronto (AP); S. Parini, M.C. D'Antonio, M. Vacchetti – San Giovanni in Persiceto (BO); G. Arpaia, S. Cervone, A. Leggeri – San Marco in Lamis (FG); R. Sturaro, M. Raffa – Sanremo (IM); M. Gardinali – Santa Maria Maddalena (RO); F. Calcaterra, F. Cataldi, M. Miola, D. Corzato – Schio (VI); S. Manfrini, M. Camilloni, C. Landi – Senigallia (AN); I. Tanganelli – Siena; G. Felace, I. Fumagalli – Spilimbergo (PN); G. Divizia – Spoleto (PG); M.B. Diodati, B. Macerola – Sulmona (AQ); G. Cicioni – Terni; A. Travaglini, A. Di Gianvito, P. Draghi, F. Pinoca, N. Nulli – Terni; L. Richiardi, A. Clerico, C. Rossi – Torino; P. Acler, T. Romanelli, S. Inchiostro – Trento; R. Candido, E. Caroli, E. Manca, E. Tommasi, N. Daris – Trieste; M. Vasta, M. Sudano, M.G. Pronti, G. Martinelli – Urbino (PU); S. Sposito – Velletri (RM); F. Cervellino, A. Zampino, R. Sinisi - Venosa (PZ); A. Schellino – Verbania Pallanza (VB); A. Basso, E. Brun, M. Strozzabosco, M. Simoncini, C. Grigoletto, F. Zen, C.A. Mesturino – Vicenza; R. Mingardi, L. Lora, C. Stocchiero, C. Nicoletti – Vicenza.
